# Supplementary material for: FeHS vacancies in a Prussian white cathode leads to enhanced FeLS activity and electrode kinetics for boosted K+ storage
Source: Royal Society of Chemistry journal article supplement (doi:10.1039/d3ta07964c), 2024-01-01
Supplement: d3ta07964c1.pdf [file d3ta07964c1.pdf]

## Supplementary information

# **Fe<sup>HS</sup> Vacancies in Prussian White Cathode Leads to Enhanced Fe<sup>LS</sup> Activity and Electrode Kinetics Towards Boosted K<sup>+</sup> Storage**

Shun Zi<sup>#, a</sup>, Zixing Wang<sup>#, a</sup>, Jinlong Ke<sup>#, a</sup>, Ying Mo<sup>a</sup>, Kexuan Wang<sup>b</sup>, Shi Chen<sup>b</sup>, Rui Tang<sup>a, \*</sup>, Yanhua Li<sup>c, \*</sup>, Peng Gao<sup>a, \*</sup>, Jilei Liu<sup>a</sup>

<sup>a</sup> *College of Materials Science and Engineering, Hunan Joint International Laboratory of Advanced Materials and Technology for Clean Energy, Hunan Province Key Laboratory for Advanced Carbon Materials and Applied Technology, Hunan University, Changsha 410082, China*

<sup>b</sup> *Joint Key Laboratory of the Ministry of Education, Institute of Applied Physics and Materials Engineering, University of Macau, Avenida da Universidade, Taipa, Macau 999078, China*

<sup>c</sup> *School of Materials Science and Engineering, Hunan Institute of Technology, Hengyang 421002, China*

*Corresponding author. E-mail address: tangrui01@hnu.edu.cn (Rui Tang); liyanhua87@hnu.edu.cn (Yanhua Li); gaop@hnu.edu.cn (Peng Gao)*

<sup>#</sup> S.Z., Z.X.W. and J.L.K. contributed equally to this work.

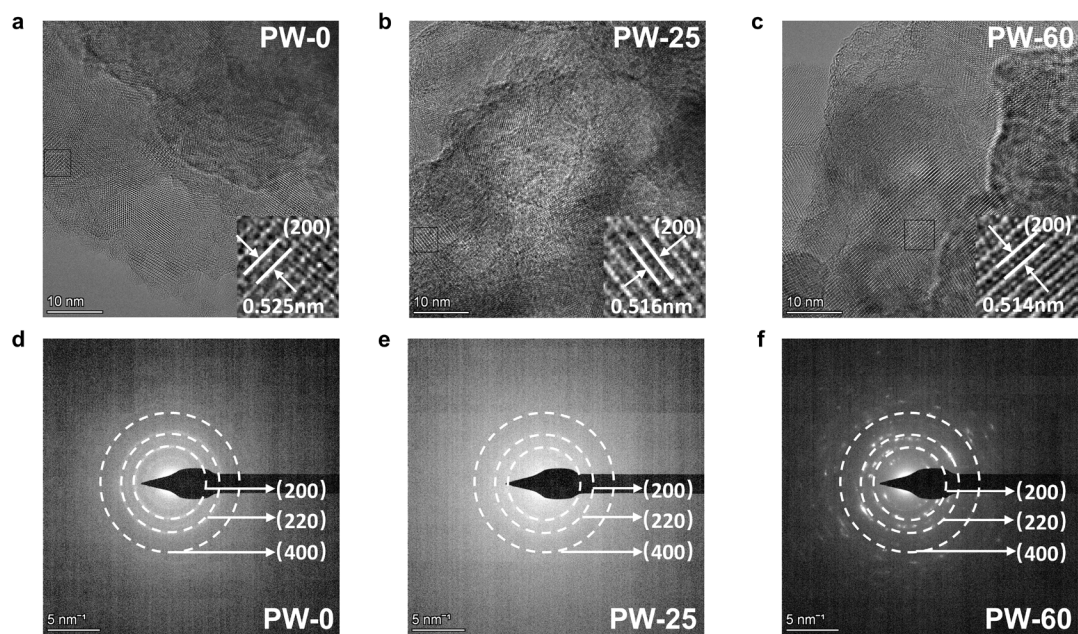

**Figure S1.** (a-c) HRTEM images, and (d-f) selected area electron diffractions of as-prepared three samples.

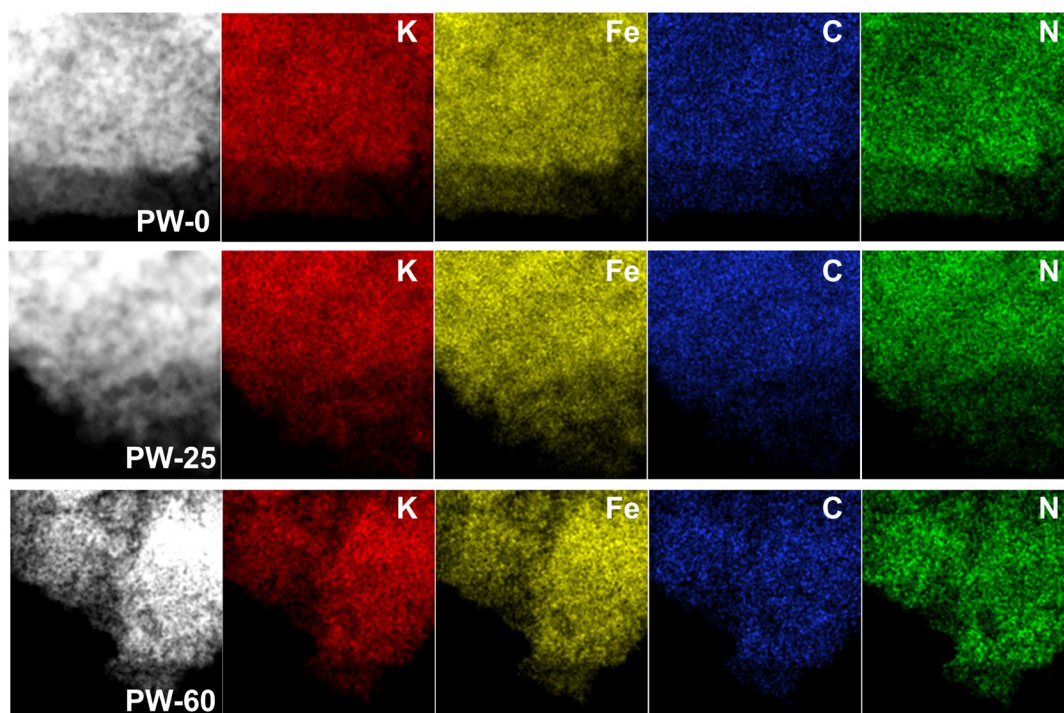

**Figure S2.** EDS elemental mapping images of as-prepared three samples.

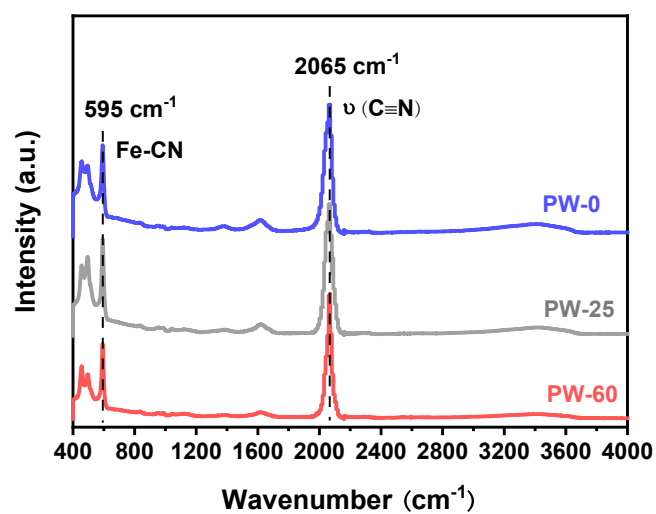

Figure S3. FTIR spectrum of PW-0, PW-25 and PW-60.

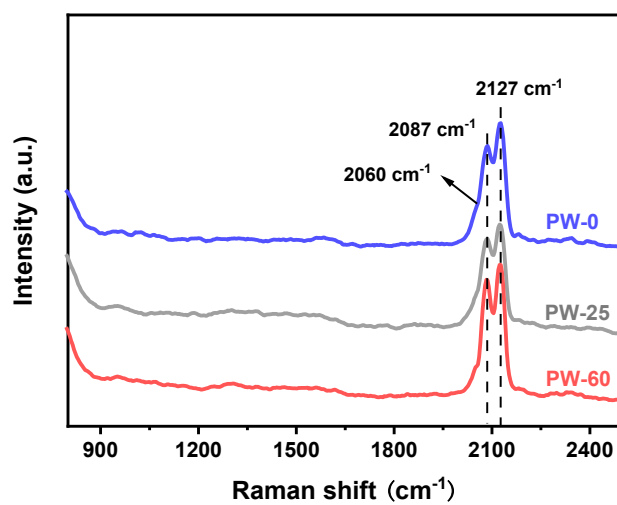

Figure S4. Raman spectrum of PW-0, PW-25 and PW-60.

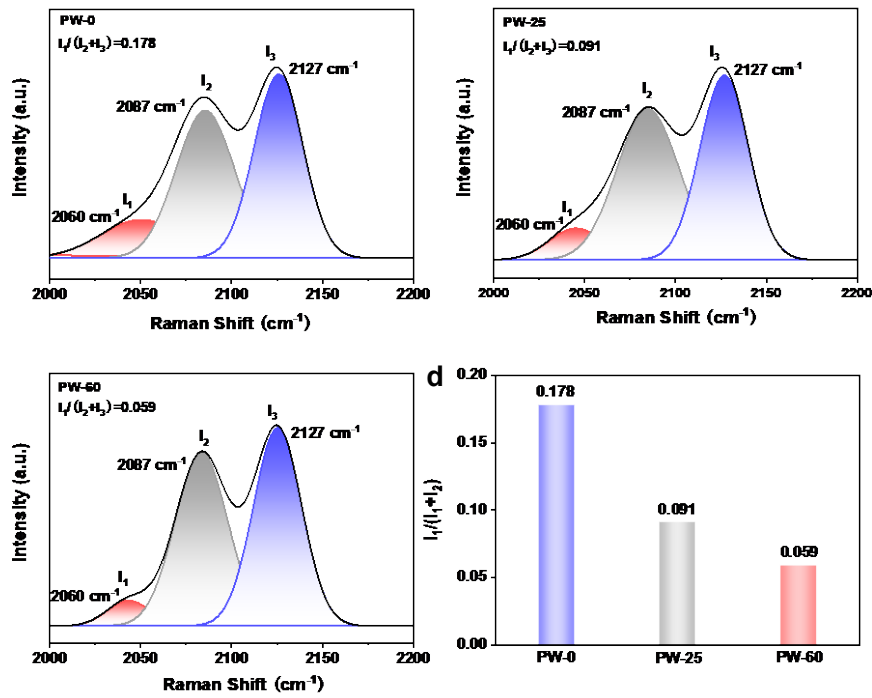

**Figure S5.** Raman spectra of (a) PW-0, (b) PW-25 and (c) PW-60, (d) peak area ratios ( $I_1/I_2+I_3$ ) comparison.

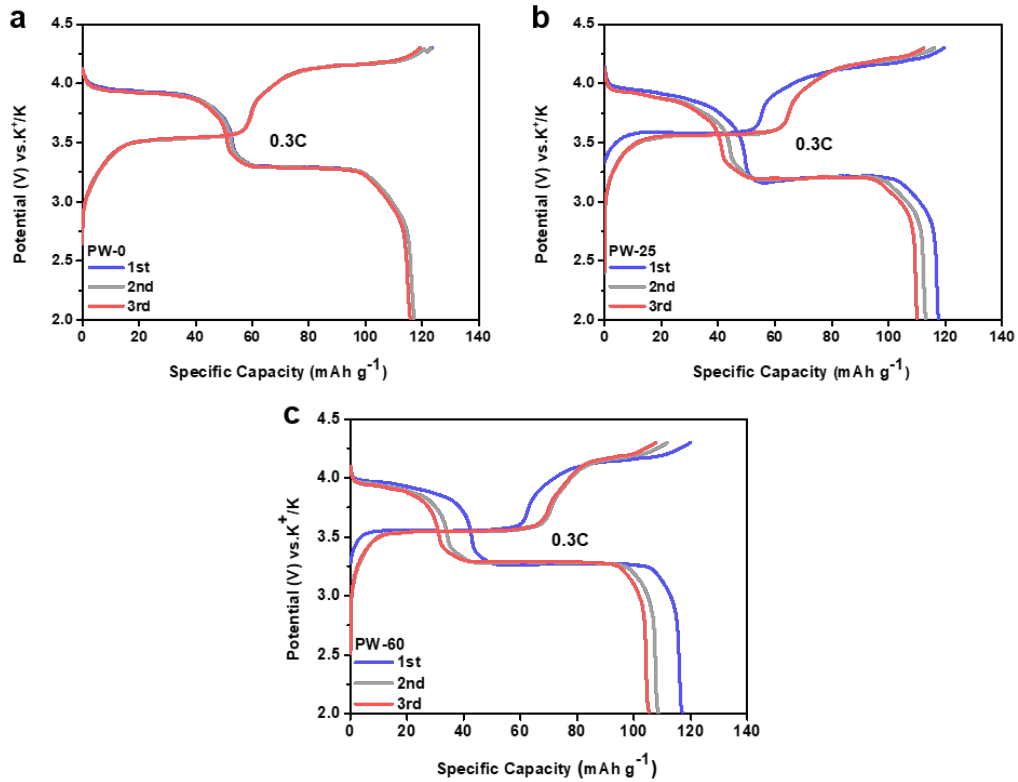

**Figure S6.** The first three cycles GCD curves at 0.3C of (a) PW-0, (b) PW-25 and (c) PW-60. (1C = 100 mA g<sup>-1</sup>)

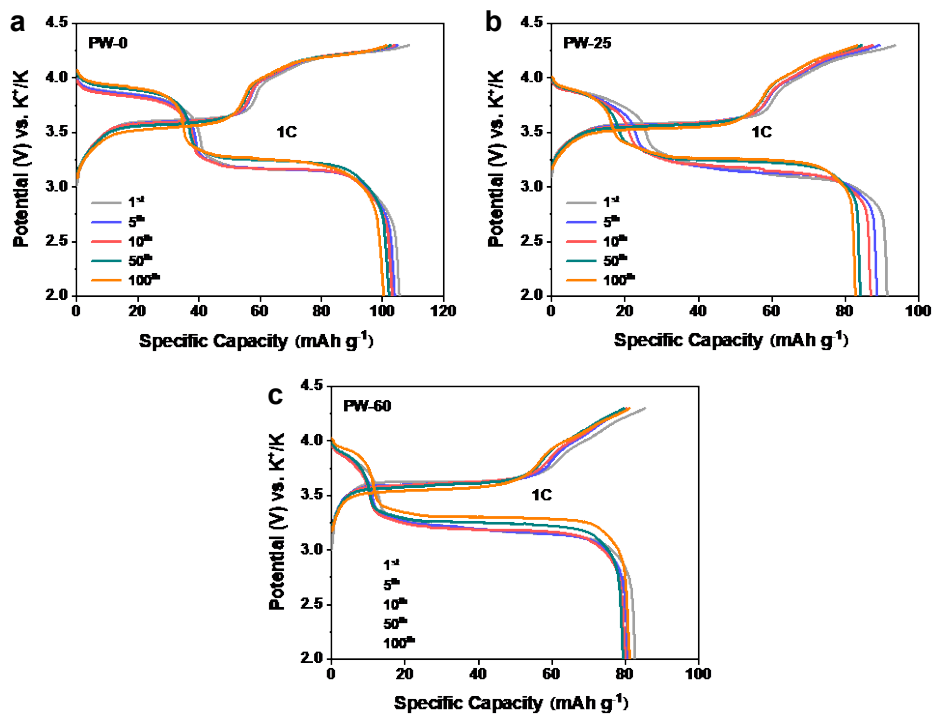

**Figure S7.** The 1<sup>st</sup>, 5<sup>th</sup>, 10<sup>th</sup>, 50<sup>th</sup> and 100<sup>th</sup> GCD curves at 1C of (a) PW-0, (b) PW-25 and (c) PW-60, following three cycles at 0.3C. (1C = 100 mA g<sup>-1</sup>)

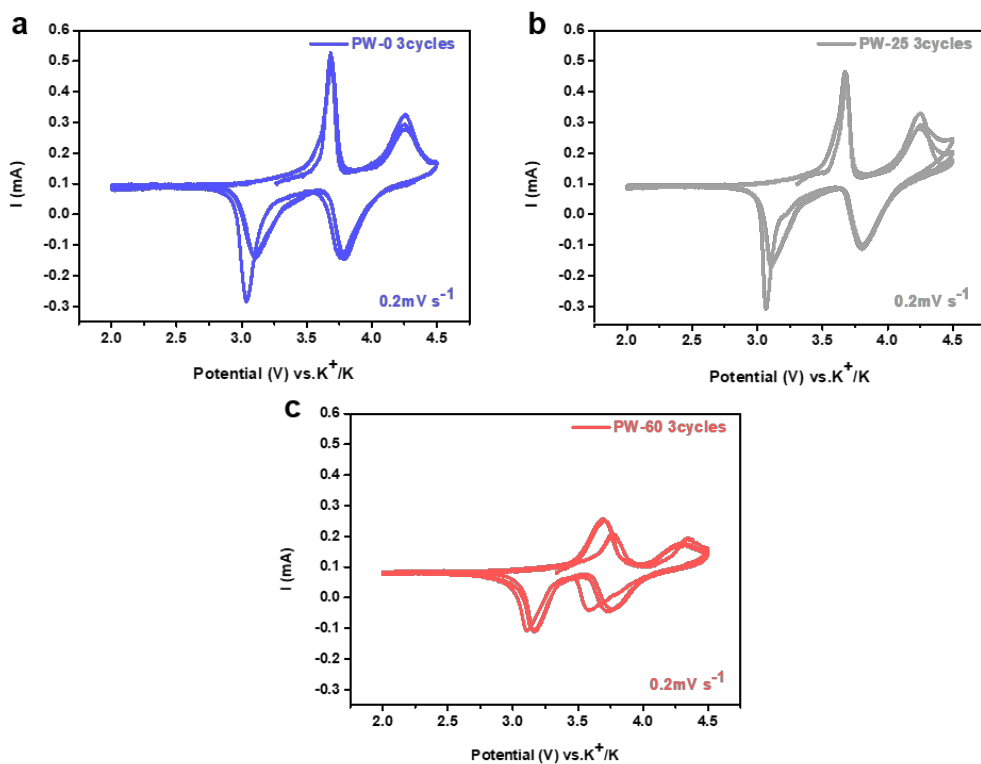

**Figure S8.** The first 3 cycles cyclic voltammetry curves of (a) PW-0, (b) PW-25 and (c) PW-60 at a scan rate of 0.2 mV s<sup>-1</sup> within the voltage range of 2.0-4.3V (vs. K<sup>+</sup>/K).

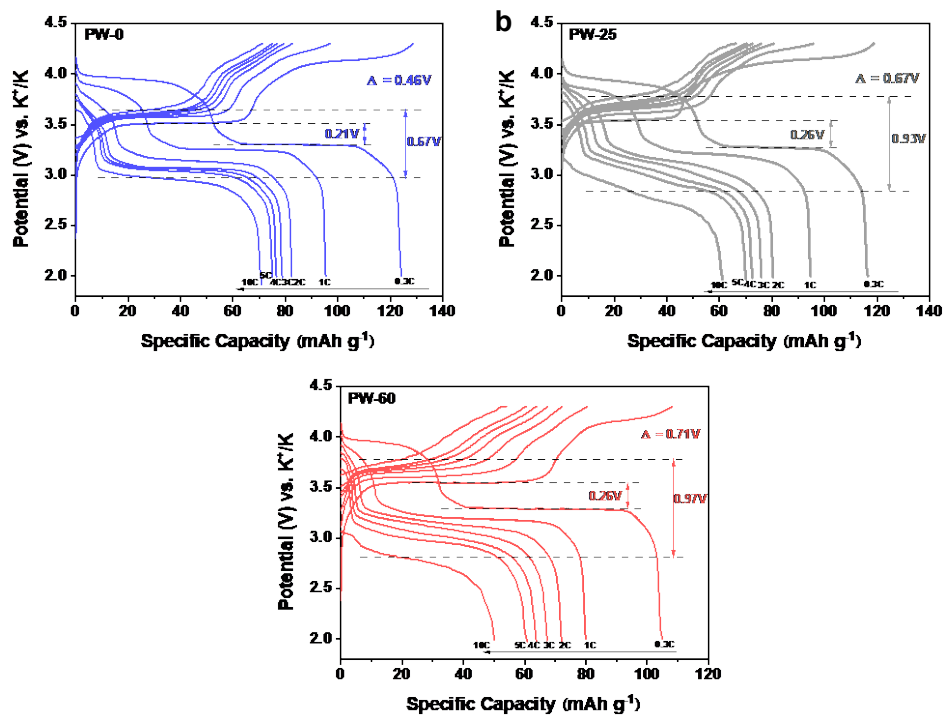

**Figure S9.** The GCD curves at different current densities of (a) PW-0, (b) PW-25 and (c) PW-60. (1C = 100 mA g<sup>-1</sup>)

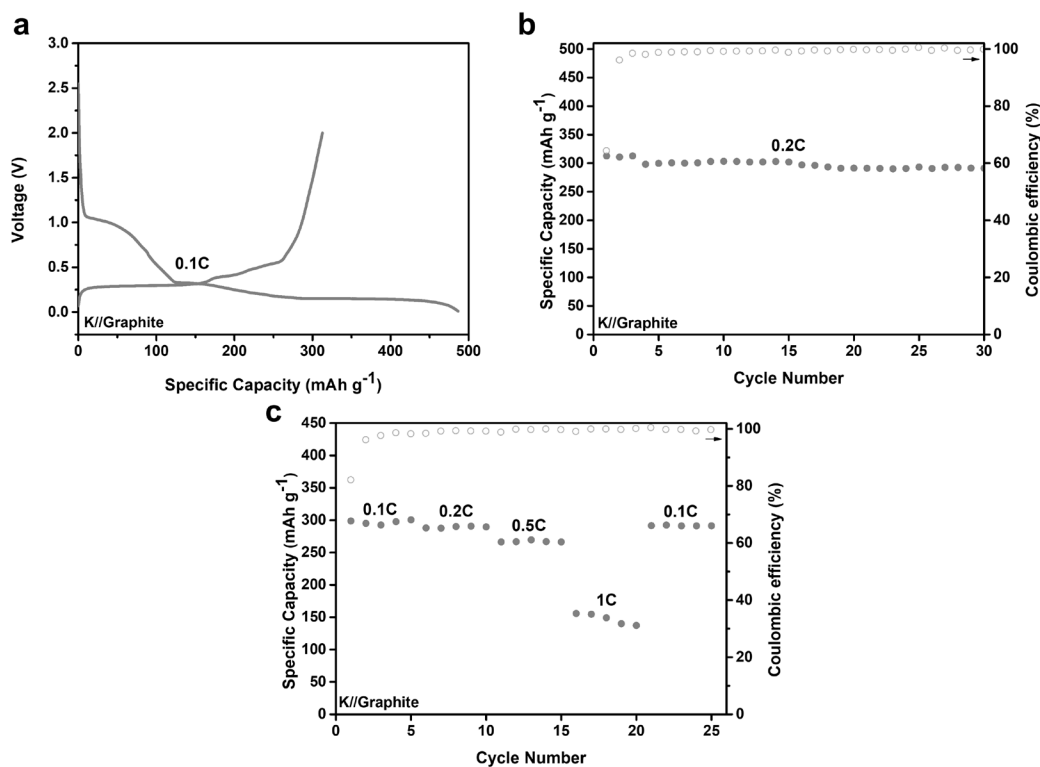

**Figure S10.** (a) The first galvanostatic charge-discharge profile of the K//Graphite

half-cell at 0.1C, (b) The cycle performance of K//Graphite half-cell at 0.2C, (c) The rate performance of K//Graphite half-cell. (1C = 280 mA g<sup>-1</sup>)

**Table S1.** Certain parameters of full cell for PW-0.

| Parameters of full cell |        |
|-------------------------|--------|
| N/P ratio               | 0.87   |
| electrolyte amount      | 140 ul |

**Table S2.** Comparison of potassium storage properties between the PW-0 and previously reported Prussian blue analogs.

| Cathode material                    | Initial discharge capacity (mAh g <sup>-1</sup> /mA g <sup>-1</sup> ) | Capacity retention/cycle | Rate performance (mAh g <sup>-1</sup> /mA g <sup>-1</sup> ) | Reference |
|-------------------------------------|-----------------------------------------------------------------------|--------------------------|-------------------------------------------------------------|-----------|
| PW-0                                | 93.1/100                                                              | 93.1%/300                | 70.2/1000                                                   | This work |
| KMF-40                              | 120.5/100                                                             | 69.4%/100                | 73.2/500                                                    | 1         |
| KMF-EDTA                            | 154.7/15                                                              | 92.3%/300                | 74/500                                                      | 2         |
| KNiHCF                              | 62.8/100                                                              | 88.6%/100                | 51.1/1000                                                   | 3         |
| KNHCF                               | 57.0/10                                                               | 87.3%/1000               | 13.1/500                                                    | 4         |
| KFeHCF-E                            | 77.0/25                                                               | 87.6%/3200               | 42/1000                                                     | 5         |
| PW-HQ                               | 113.1/50                                                              | 93.0%/1000               | 60.4/1000                                                   | 6         |
| PB-PPY                              | 108.6/50                                                              | ~48.7%/900               | 35.5/500                                                    | 7         |
| KFeHCF-V                            | 77.6/25                                                               | 81.2%/50                 | 32/200                                                      | 8         |
| KHCF@PPY                            | 88.9/50                                                               | 86.8%/500                | 60/1000                                                     | 9         |
| PBN <sub>0.4</sub> C <sub>0.6</sub> | 86.0/20                                                               | 96.9%/150                | ~45/200                                                     | 10        |

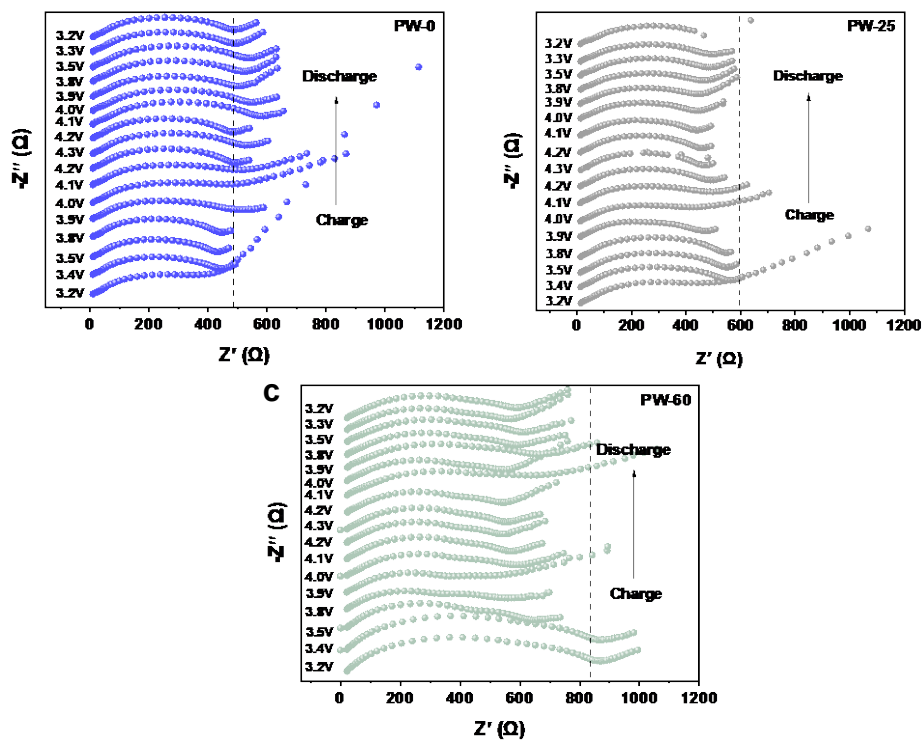

Figure S11. In-situ EIS Nyquist plots of (a) PW-0, (b) PW-25 and (c) PW-60.

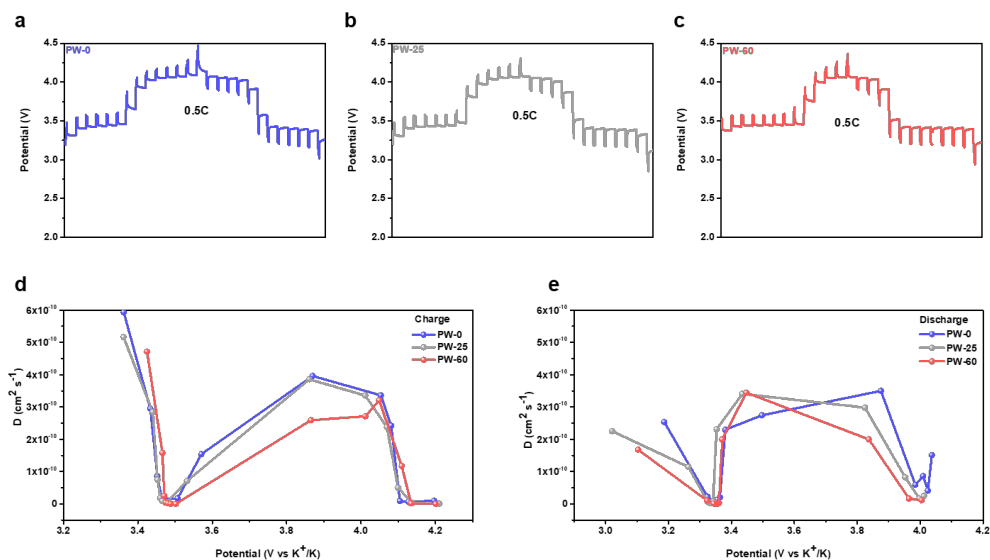

Figure S12. (a-c) The GITT curves obtained at a current density of 0.5C within the voltage range of 2.0-4.3V (vs.  $K^+/K$ ), and (d-e) the calculated diffusion coefficients of PW-0, PW-25 and PW-60. ( $1C = 100 \text{ mA g}^{-1}$ )



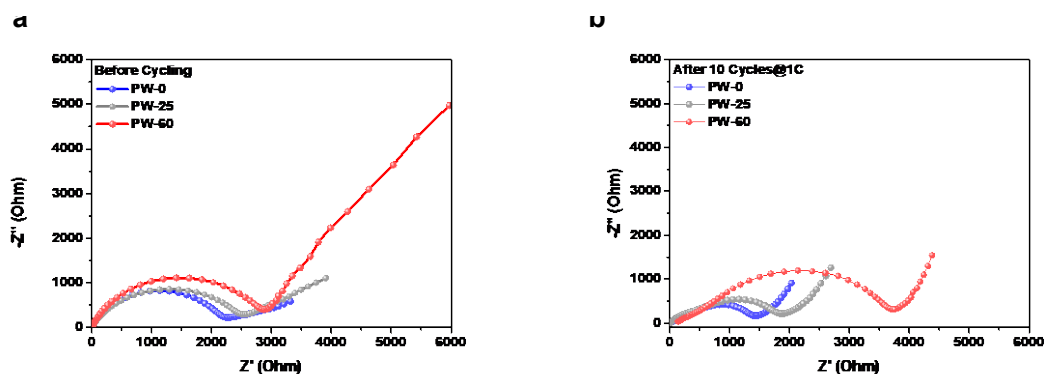

**Figure S13.** The Nyquist plots of (a) pristine electrodes without cycling and (b) the electrodes after ten cycles at 1C. (1C = 100 mA g<sup>-1</sup>)

## Reference

1. W. Chen, Z. Jian, H. Li, Y. Qi, W. Jin, Y. Xia, *Chinese Chemical Letters*, 2021, **32**, 2433-2437.
2. L. Deng, J. Qu, X. Liu, J. Zhang, Y. Hong, M. Feng, J. Wang, M. Hu, L. Zeng, Q. Zhang, L. Guo, Y. Zhu, *Nature. Communication*, 2021, **12**, 2167.
3. L. Li, Z. Hu, C. Wang, Q. Zhang, S. Zhao, J. Peng, K. Zhang, S.-L. Chou, J. Chen, *Angew. Chem., Int. Ed*, 2021, **60**, 13050-13056.
4. S. Chong, Y. Wu, S. Guo, Y. Cao, *Energy Storage Mater*, 2019, **22**, 120-127.
5. W. Shu, M. Huang, L. Geng, F. Qiao, X. Wang, *Small*, 2023, **19**, 2207080.
6. R. Ma, Z. Wang, Q. Fu, W. Zhou, Y. Mo, J. Tu, Z. Wang, P. Gao, C. Fan, J. Liu, J. *Energy Chem*, 2023, **83**, 16-23.
7. M. Zhou, X. Tian, Y. Sun, X. He, H. Li, T. Ma, Q. Zhao, J. Qiu, *Nano Res*, 2023, **16**, 6326-6333.
8. Z. Wang, W. Zhuo, J. Li, L. Ma, S. Tan, G. Zhang, H. Yin, W. Qin, H. Wang, L. Pan, A. Qin, W. Mai, *Nano Energy*, 2022, **98**, 107243.
9. Q. Xue, L. Li, Y. Huang, R. Huang, F. Wu, R. Chen, *ACS Appl. Mater. Interfaces* 2019, **11**, 22339-22345.
10. B. Huang, Y. Shao, Y. Liu, Z. Lu, X. Lu, S. Liao, *ACS Appl. Energy Mater*, 2019, **2**, 6528-6535.
